# Supplementary material for: Somatotroph Tumors and the Epigenetic Status of the GNAS Locus
Source: MDPI journal article supplement (doi:10.3390/ijms22147570), 2021-07-15
Supplement: s1 [file s1]

**Supplemental Table S1.**

| Transcript (NCBI RefSeq) | Length (nt) | Transcript variant name | Ensembl ID          | Strand | Protein (NCBI RefSeq) | Length (aa) | Protein name | Isoform (NCBI)       | Notes                                                                                                                                                                                                             |
|--------------------------|-------------|-------------------------|---------------------|--------|-----------------------|-------------|--------------|----------------------|-------------------------------------------------------------------------------------------------------------------------------------------------------------------------------------------------------------------|
| NM_000516.7              | 1854        | 1 (GNAS)                | ENST000000371085.8  | plus   | NP_000507.1           | 394         | GNAS         | GNAS                 | canonical G <sub>α</sub> s                                                                                                                                                                                        |
| NM_080425.4              | 4027        | 2 (XL)                  | ENST000000371100.9  | plus   | NP_536350.2           | 1037        | GNAS         | XLas                 |                                                                                                                                                                                                                   |
| NM_080426.4              | 1809        | 3 (GNASS)               | ENST000000371095.7  | plus   | NP_536351.1           | 380         | GNAS         | GNASS                | Lacks an internal exon and uses an alternate splice site, compared to variant 1. This isoform GNASS, also known as alpha-S1, differs in an internal region but has identical N- and C-termini, compared to GNASL. |
| NM_001077489.4           | 1866        | 7                       | ENST000000265620.11 | plus   | NP_001070957.1        | 379         | GNAS         | g                    | Missing last codon re: variant GNAS-S                                                                                                                                                                             |
| NM_001077488.5           | 1857        | 6 (GNASL)               | ENST000000354359.12 | plus   | NP_001070956.1        | 395         | GNAS         | f (GNASL)            |                                                                                                                                                                                                                   |
| NM_016592.5              | 2551        | 4 (NESP)                | ENST000000371075.7  | plus   | NP_057676.1           | 245         | NESP/SCG6    | NESP/SCG6            | neuroendocrine secretory protein / secretogranin VI                                                                                                                                                               |
| NR_132273.1              | 1075        | 14 (A/B variant 1)      | ENST000000464960.5  | plus   |                       |             |              |                      |                                                                                                                                                                                                                   |
| NR_132272.2              | 716         | 13 (A/B variant 2)      | ENST000000490374.6  | plus   |                       |             |              |                      | differs at 5' and truncated 3' ends                                                                                                                                                                               |
| NR_002785.2              | 1158        | GNAS-AS1                | ENST000000424094.6  | minus  |                       |             |              | GNAS antisense RNA 1 | 3 other potential splice isoforms (Ensembl)                                                                                                                                                                       |
| NM_001077490.3           | 4027        | 2 (ALEX)                | ENST000000371100.9  | plus   | NP_001070958.1        | 626         | ALEX         | ALEX                 |                                                                                                                                                                                                                   |
|                          | 2073        | GNAS-203 (ALEX)         | ENST000000306120.4  | plus   |                       |             | ALEX         |                      | present in Ensembl/Uniprot                                                                                                                                                                                        |
| NM_001309840.2           | 1580        | 9                       | ENST000000477931.5  | plus   | NP_001296769.1        | 335         | ALEX         | h                    |                                                                                                                                                                                                                   |
| NM_001309842.2           | 1114        | 10                      | ENST000000371081.5  | plus   | NP_001296771.1        | 87          | ALEX         | i                    |                                                                                                                                                                                                                   |
| NM_001309861.2           | 1662        | 11                      |                     | plus   | NP_001296790.1        | 335         | ALEX         | h                    |                                                                                                                                                                                                                   |
| NM_001309883.1           | 3180        | 12                      | ENST000000604005.6  | plus   | NP_001296812.1        | 626         | ALEX         | ALEX                 |                                                                                                                                                                                                                   |

|                |      |                    |      |                |      |           |    |
|----------------|------|--------------------|------|----------------|------|-----------|----|
| XM_017027812.2 | 3752 | X1<br>(predicted)  | plus | XP_016883301.1 | 1038 | GNAS      | X1 |
| XM_017027813.2 | 3707 | X2<br>(predicted)  | plus | XP_016883302.1 | 1023 | GNAS      | X2 |
| XM_017027814.2 | 3704 | X3<br>(predicted)  | plus | XP_016883303.1 | 1022 | GNAS      | X3 |
| XM_024451872.1 | 2573 | X4<br>(predicted)  | plus | XP_024307640.1 | 362  | GNAS      | X4 |
| XM_017027815.1 | 1455 | X5<br>(predicted)  | plus | XP_016883304.1 | 347  | GNAS      | X5 |
| XM_017027821.1 | 1709 | X14<br>(predicted) | plus | XP_016883310.1 | 245  | NESP/SCG6 | X9 |
| XM_017027822.1 | 1382 | X15<br>(predicted) | plus | XP_016883311.1 | 245  | NESP/SCG6 | X9 |
| XM_024451873.1 | 1492 | X6<br>(predicted)  | plus | XP_024307641.1 | 335  | ALEX      | X6 |
| XM_024451874.1 | 1578 | X7<br>(predicted)  | plus | XP_024307642.1 | 335  | ALEX      | X6 |
| XM_024451875.1 | 1556 | X8<br>(predicted)  | plus | XP_024307643.1 | 335  | ALEX      | X6 |
| XM_017027816.1 | 2260 | X9<br>(predicted)  | plus | XP_016883305.1 | 320  | ALEX      | X7 |
| XM_017027820.1 | 1446 | X13<br>(predicted) | plus | XP_016883309.1 | 320  | ALEX      | X7 |
| XM_017027817.1 | 1542 | X10<br>(predicted) | plus | XP_016883306.1 | 320  | ALEX      | X8 |
| XM_017027818.2 | 1567 | X11<br>(predicted) | plus | XP_016883307.1 | 320  | ALEX      | X8 |
| XM_017027819.1 | 1506 | X12<br>(predicted) | plus | XP_016883308.1 | 320  | ALEX      | X8 |
| XR_002958471.1 | 2255 | X16<br>(predicted) | plus |                |      |           |    |

### Supplemental Figure S1: Allelic quantification of *GNAS* expression by pyrosequencing

Pyrogram of the quantification of the *GNAS* allelic expression of 2 heterozygous somatotroph adenomas for the Fok1 polymorphism.

The pyrosequencer performs real-time sequencing of the target sequence (AG/AATGTA) by neosynthesis of the complementary strand by injecting the nucleotides in a pre-programmed order (CAGACTGTA). At the position of the Fok1 polymorphism, the device sequentially injects a G then an A. The peak height ratio gives the percentage of strands having incorporated a G or an A.

NB: the nucleotide following the Fok1 polymorphism is an A, hence the peak height of A.

A: Tumor 58: only one allele is expressed (bearing the G).

B: Tumor 29: this tumor shows biallelic expression of *GNAS*.

C: Tumor 82: this tumor shows bi-allelic expression of *GNAS*.

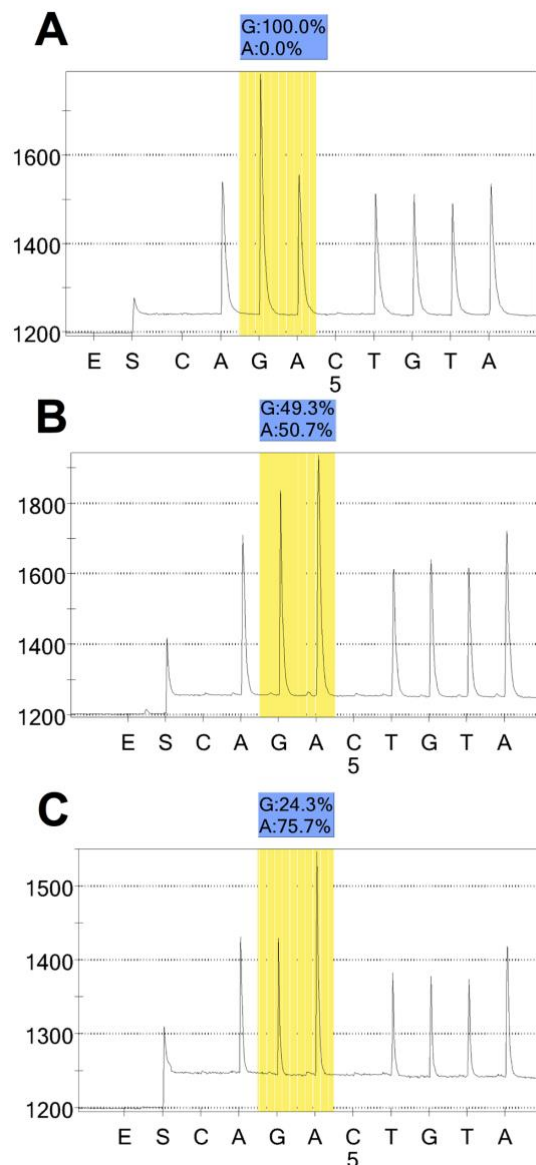

**Supplemental Table S2. Clincobiological characteristics of patients and tumors from cohort I**  
**N: no, Y: yes, MI: methylation index**

| Tumor number | age (years) | sexe   | grp_transcriptome | gsp mutational status | WHO 2017 Tumor Type | GNAS expression | cg2676-7990 | cg1765-2507 | cg2240-7822 | Mean MI |
|--------------|-------------|--------|-------------------|-----------------------|---------------------|-----------------|-------------|-------------|-------------|---------|
| P001         | 38          | male   | t5                | N                     | Thyreotroph         | 18,97           | 0,48        | 0,47        | 0,52        | 0,49    |
| P007         | 51          | female | t5                | N                     | Somatotroph         | 18,13           | 0,56        | 0,50        | 0,54        | 0,54    |
| P008         | 71          | male   | t5                | N                     | Somatotroph         | 18,28           |             |             |             |         |
| P011         | 49          | female | t5                | N                     | Somatotroph         | 18,07           | 0,56        | 0,49        | 0,56        | 0,54    |
| P014         | 65          | female | t5                | N                     | Thyreotroph         | 17,68           | 0,53        | 0,47        | 0,57        | 0,52    |
| P015         | 62          | female | t5                | N                     | Plurihormonal PIT-1 | 18,44           | 0,47        | 0,57        | 0,59        | 0,54    |
| P018         | 51          | female | t6A               | N                     | Mixed_GH-PRL        | 16,93           | 0,53        | 0,52        | 0,57        | 0,54    |
| P019         | 53          | female | t6A               | N                     | Mixed_GH-PRL        | 18,38           | 0,60        | 0,59        | 0,63        | 0,60    |
| P020         | 58          | female | t6B               | Y                     | Somatotroph         | 17,39           | 0,54        | 0,53        | 0,58        | 0,55    |
| P023         | 68          | female | t5                | N                     | Thyreotroph         | 18,12           | 0,50        | 0,30        | 0,36        | 0,39    |
| P024         | 32          | male   | t6B               | N                     | Somatotroph         | 17,52           | 0,57        | 0,56        | 0,57        | 0,57    |
| P028         | 29          | male   | t6B               | Y                     | Somatotroph         | 17,87           | 0,49        | 0,39        | 0,49        | 0,46    |
| P031         | 64          | female | t6B               | N                     | Plurihormonal PIT-1 | 18,16           | 0,50        | 0,53        | 0,52        | 0,52    |
| P035         | 34          | male   | t6B               | Y                     | Somatotroph         | 17,01           | 0,50        | 0,46        | 0,55        | 0,50    |
| P036         | 49          | female | t6B               | Y                     | Mixed_GH-PRL        | 17,45           | 0,57        | 0,57        | 0,61        | 0,58    |
| P039         | 46          | female | t6B               | Y                     | Somatotroph         | 17,39           | 0,56        | 0,50        | 0,59        | 0,55    |
| P040         | 26          | male   | t5                | Y                     | Somatotroph         | 17,56           | 0,54        | 0,47        | 0,50        | 0,50    |
| P047         | 47          | female | t5                | N                     | Thyreotroph         | 19,59           | 0,56        | 0,56        | 0,64        | 0,59    |
| P051         | 47          | female | t6B               | N                     | Mixed_GH-PRL        | 18,65           | 0,62        | 0,60        | 0,67        | 0,63    |
| P057         | 64          | male   | t5                | N                     | Plurihormonal PIT-1 | 18,12           | 0,49        | 0,45        | 0,45        | 0,46    |
| P058         | 65          | male   | t5                | N                     | Plurihormonal PIT-1 | 20,56           | 0,58        | 0,55        | 0,59        | 0,58    |
| P059         | 49          | male   | t6B               | Y                     | Mixed_GH-PRL        | 16,80           |             |             |             |         |
| P060         | 34          | female | t6B               | N                     | Plurihormonal PIT-1 | 17,30           | 0,59        | 0,60        | 0,61        | 0,60    |
| P065         | 48          | male   | t6A               | N                     | Somatotroph         | 18,56           |             |             |             |         |
| P067         | 68          | male   | t6B               | Y                     | Somatotroph         | 17,38           | 0,57        | 0,52        | 0,62        | 0,57    |
| P072         | 46          | male   | t6B               | N                     | Somatotroph         | 17,79           | 0,60        | 0,57        | 0,62        | 0,60    |
| P076         | 49          | female | t6B               | Y                     | Mixed_GH-PRL        | 17,28           |             |             |             |         |
| P077         | 30          | male   | t5                | N                     | Thyreotroph         | 18,43           | 0,47        | 0,37        | 0,39        | 0,41    |
| P085         | 48          | female | t5                | N                     | Somatotroph         | 17,37           |             |             |             |         |
| P086         | 60          | male   | t6B               | Y                     | Somatotroph         | 17,22           |             |             |             |         |
| P089         | 37          | male   | t6A               | N                     | Somatotroph         | 17,53           | 0,54        | 0,50        | 0,52        | 0,52    |
| P092         | 47          | female | t5                | N                     | Plurihormonal PIT-1 | 18,05           |             |             |             |         |
| P093         | 35          | male   | t6B               | Y                     | Mixed_GH-PRL        | 16,95           | 0,58        | 0,62        | 0,66        | 0,62    |
| P097         | 49          | male   | t6B               | Y                     | Somatotroph         | 17,31           | 0,32        | 0,52        | 0,55        | 0,46    |

|      |    |        |     |   |                     |       |      |      |      |      |
|------|----|--------|-----|---|---------------------|-------|------|------|------|------|
| P099 | 46 | female | t6B | Y | Mixed_GH-PRL        | 16,47 |      |      |      |      |
| P102 | 53 | male   | t6B | N | Somatotroph         | 17,46 | 0,58 | 0,54 | 0,61 | 0,58 |
| P103 | 84 | male   | t6A | N | Somatotroph         | 18,19 | 0,59 | 0,59 | 0,63 | 0,60 |
| P107 | 40 | female | t6A | Y | Somatotroph         | 17,43 | 0,47 | 0,43 | 0,50 | 0,47 |
| P119 | 64 | male   | t6A | N | Somatotroph         | 17,65 |      |      |      |      |
| P123 | 41 | male   | t6A | N | Somatotroph         | 18,20 |      |      |      |      |
| P129 | 22 | female | t5  | N | Somatotroph         | 17,70 | 0,56 | 0,51 | 0,59 | 0,55 |
| P131 | 42 | male   | t5  | N | Plurihormonal_PIT-1 | 18,60 |      |      |      |      |
| P133 | 55 | female | t6A | N | Somatotroph         | 17,86 |      |      |      |      |

**Supplemental Table S3. Biological characteristics of the 82 tumors from cohort II**

|    | Onco-<br>gene gsp | Methylation<br>level of A/B<br>DMR (%) | GNAS<br>1000*copies/<br>copies of<br>BGUS | SSTR2<br>1000*<br>copies/<br>copies of<br>BGUS | AIP 100*<br>copies/<br>copies of<br>BGUS | GNAS<br>allelic<br>quantifica<br>tion (%) |
|----|-------------------|----------------------------------------|-------------------------------------------|------------------------------------------------|------------------------------------------|-------------------------------------------|
| 1  | gsp+              | 37                                     | 461,81                                    | 825,74                                         |                                          |                                           |
| 2  | gsp+              | 47                                     | 593,99                                    | 741,78                                         | 3127,8                                   | 24                                        |
| 3  | gsp+              |                                        | 292,91                                    | 85,1                                           | 1069,44                                  | 9,95                                      |
| 4  | gsp+              | 36                                     | 146,28                                    | 1885,3                                         |                                          |                                           |
| 5  | gsp+              | 40                                     | 330,31                                    | 253,31                                         | 1048,94                                  |                                           |
| 6  | gsp+              | 46                                     | 16,36                                     | 24,66                                          | 324,2                                    |                                           |
| 7  | gsp+              | 39                                     | 174,88                                    | 22,09                                          | 691,24                                   | 26,9                                      |
| 8  | gsp+              | 42                                     |                                           |                                                |                                          |                                           |
| 9  | gsp+              | 30                                     | 728,82                                    | 65,94                                          | 1268,37                                  | 7,8                                       |
| 10 | gsp+              | 38                                     | 332,3                                     | 85,6                                           | 1777,67                                  | 17,45                                     |
| 11 | gsp+              | 40                                     | 576,55                                    | 46,5                                           | 983,12                                   |                                           |
| 12 | gsp+              | 41                                     | 206,93                                    | 335,02                                         | 1005,2                                   |                                           |
| 13 | gsp+              | 41                                     |                                           |                                                |                                          |                                           |
| 14 | gsp+              | 50                                     | 475,34                                    | 106,43                                         | 1730,31                                  | 20,5                                      |
| 15 | gsp+              | 51                                     | 107,77                                    | 115,27                                         | 609,54                                   |                                           |
| 16 | gsp+              | 52                                     | 376,07                                    | 126,2                                          | 1437,47                                  |                                           |
| 17 | gsp+              | 42                                     | 239,49                                    | 771,07                                         |                                          | 4,5                                       |
| 18 | gsp+              | 43                                     | 272,57                                    | 20,89                                          |                                          |                                           |
| 19 | gsp+              | 48                                     | 27,35                                     | 43,95                                          | 179,1                                    |                                           |
| 20 | gsp-              | 25                                     | 288,24                                    | 242,82                                         | 575,67                                   |                                           |
| 21 | gsp-              | 28                                     | 173,88                                    | 7,71                                           | 382,31                                   | 25,5                                      |
| 22 | gsp-              | 33                                     | 466,55                                    | 131,71                                         |                                          |                                           |
| 23 | gsp-              | 36                                     | 841,17                                    | 23,95                                          | 4569,59                                  |                                           |
| 24 | gsp-              | 37                                     | 898,08                                    | 65,13                                          | 121,3                                    | 28,95                                     |
| 25 | gsp-              | 37                                     | 323,87                                    | 378,46                                         | 1233,09                                  |                                           |
| 26 | gsp-              | 38                                     | 633,13                                    | 188,41                                         | 2011,05                                  | 17,6                                      |
| 27 | gsp-              | 38                                     | 56,75                                     | 349,59                                         | 448,68                                   |                                           |
| 28 | gsp-              | 38                                     | 667,93                                    | 209,03                                         |                                          | 35,5                                      |
| 29 | gsp-              | 38                                     | 167,75                                    | 12,24                                          | 1494,42                                  | 47,35                                     |
| 30 | gsp-              | 38                                     | 206,08                                    | 508,01                                         |                                          |                                           |
| 31 | gsp-              | 39                                     | 755,12                                    | 1045,47                                        | 2074,66                                  | 2,35                                      |
| 32 | gsp-              | 39                                     | 170,44                                    | 135,52                                         | 565,03                                   | 21,6                                      |
| 33 | gsp-              | 39                                     | 935,66                                    | 89,26                                          | 1794,53                                  |                                           |

|    |      |      |         |         |         |       |
|----|------|------|---------|---------|---------|-------|
| 34 | gsp- | 39   | 631,45  | 155,7   | 890,33  | 38,85 |
| 35 | gsp- | 39   | 562,13  | 1359,01 |         |       |
| 36 | gsp- | 39   |         |         |         |       |
| 37 | gsp- | 39   | 741,03  | 242,61  | 2952,41 | 21,6  |
| 38 | gsp- | 40   | 1063    | 197,09  | 2022,09 | 36,8  |
| 39 | gsp- | 41   | 82,77   | 1262,43 |         | 14,7  |
| 40 | gsp- | 41   | 1132,03 | 197,21  | 2429,13 | 7,65  |
| 41 | gsp- | 41   | 392,59  | 238,62  | 1363,08 |       |
| 42 | gsp- | 42   | 178,56  | 33,43   | 171,47  |       |
| 43 | gsp- | 42   | 1226,71 | 153,59  | 3752,35 | 5,25  |
| 44 | gsp- | 42   | 998,68  | 69,18   | 2415,22 | 14,65 |
| 45 | gsp- | 42   | 235,59  | 146,93  |         |       |
| 46 | gsp- | 42   | 49,39   | 2,57    | 99,4    |       |
| 47 | gsp- | 43   | 81,55   | 85,07   | 1211,18 | 29,1  |
| 48 | gsp- | 43   | 734,4   | 131,72  | 2671,26 |       |
| 49 | gsp- | 43   | 1021,4  | 32,84   | 1636,07 | 8,05  |
| 50 | gsp- | 43   | 310,93  | 72,59   | 507,07  | 20,35 |
| 51 | gsp- | 43   | 141,16  | 329,24  | 1348,92 | 13,2  |
| 52 | gsp- | 44   | 603,43  | 257,05  | 1890,23 | 47,85 |
| 53 | gsp- | 45   | 1593,18 | 1125,84 | 7171,48 |       |
| 54 | gsp- | 46   | 997,19  | 59,43   | 1639,18 |       |
| 55 | gsp- | 47   | 404,7   | 497,6   | 2806,94 | 12,85 |
| 56 | gsp- | 48   | 603,61  | 7,72    | 3907,09 |       |
| 57 | gsp- | 48   | 885,2   | 27,08   | 5304,56 |       |
| 58 | gsp- | 48   | 692,45  | 141,89  | 1330,69 | 0,25  |
| 59 | gsp- | 49   | 684,49  | 770,12  | 1987,46 | 5,1   |
| 60 | gsp- | 49   | 1359,39 | 3822,41 |         |       |
| 61 | gsp- | 50   | 556,9   | 162,66  | 778,88  |       |
| 62 | gsp- | 50   | 857,55  | 400,14  | 3373,65 | 18,05 |
| 63 | gsp- | 50   | 474,33  | 1122,09 |         | 3,85  |
| 64 | gsp- | 50   | 195,44  | 9,18    | 332,48  | 42,6  |
| 65 | gsp- | 50   | 521,35  | 267,75  | 2079,68 |       |
| 66 | gsp- | 51   | 392,8   | 171,9   | 3789,69 | 9,7   |
| 67 | gsp- | 51,8 | 247     |         |         |       |
| 68 | gsp- | 52   |         |         |         | 14,5  |
| 69 | gsp- | 52   |         |         |         | 32,05 |
| 70 | gsp- | 53   | 1699,2  | 234,72  | 1672,37 | 8,8   |
| 71 | gsp- | 55   | 333,88  | 70,62   | 1906,2  |       |

|    |      |      |        |        |         |      |
|----|------|------|--------|--------|---------|------|
| 72 | gsp- | 56   | 41,64  | 3,75   | 567,34  |      |
| 73 | gsp- | 56   | 897,7  | 82,07  | 2719,93 |      |
| 74 | gsp- | 59   | 283,95 | 81,61  | 1315,53 |      |
| 75 | gsp- | 60   | 773,52 | 138,95 | 1699,91 | 7,05 |
| 76 | gsp- | 60   | 427,48 | 45,52  | 1072,73 |      |
| 77 | gsp- | 60,7 | 1116   |        |         |      |
| 78 | gsp- | 62   | 870,94 | 270,09 | 2633,94 | 16,2 |
| 79 | gsp- | 62   | 92     |        |         |      |
| 80 | gsp- | 69   | 28,43  | 8,48   | 307,62  |      |
| 81 | gsp- | 81   | 17,54  | 1,8    | 82,44   |      |
| 82 | gsp- |      | 404,7  | 99,16  | 5157,95 | 23,5 |
